# Supplementary material for: Rebalance of the Polyamine Metabolism Suppresses Oxidative Stress and Delays Senescence in Nucleus Pulposus Cells
Source: Oxid Med Cell Longev. 2022 Feb 7;2022:8033353. doi: 10.1155/2022/8033353 (PMC8844099; doi:10.1155/2022/8033353)
Supplement: Supplementary Materials — The raw data of the bioinformatics analysis containing DEGs, GO, KEGG, and PPI are provided in the supplementary file. [file 8033353.f1.zip]

Archive with 6 entries (5 files):
- 8033353.f1/go.docx
- 8033353.f1/KEGG.docx
- 8033353.f1/string_interactions.docx
- 8033353.f1/string_network_coordinates.docx
- 8033353.f1/Supplementary file 1..docx
- 8033353.f1/
